# Supplementary material for: Degradation of tetracycline hydrochloride by heterogeneous Fenton-like reaction using Fe@Bacillus subtilis
Source: Royal Society of Chemistry journal article supplement (doi:10.1039/c5ra24155c), 2015-12-21
Supplement: c5ra24155c1.pdf [file c5ra24155c1.pdf]

### Support Information

**Figure S1.** Size histogram of *Bacillus subtilis*

**Figure S2.** Zeta potential of *Bacillus subtilis* and Fe@B. *subtilis* suspensions as a function of pH

**Table S1** Weight concentration (%) of *Bacillus subtilis* and Fe@ *Bacillus subtilis* samples from EDS analysis.

**Table S2** Atom concentration (%) of Fe@ *Bacillus subtilis* samples from XPS analysis.

**Table S3** Textural properties of *Bacillus subtilis* and Fe@B. *subtilis*.

Figure S1.

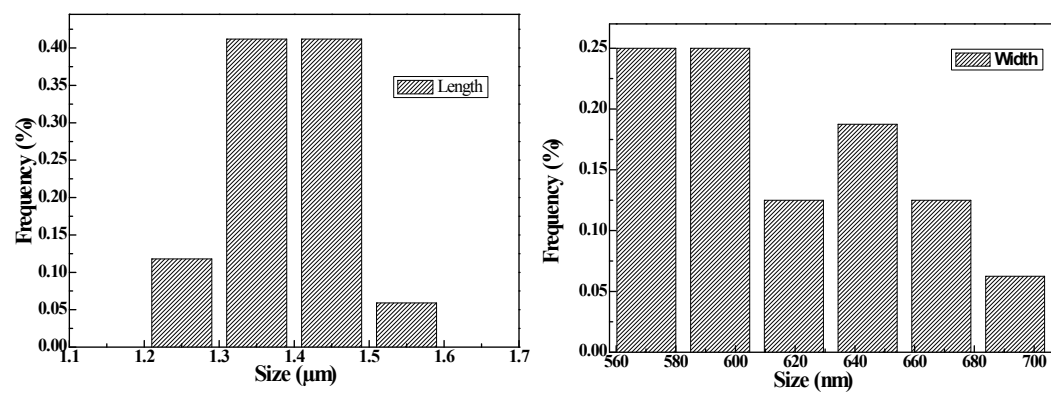

Figure S2.

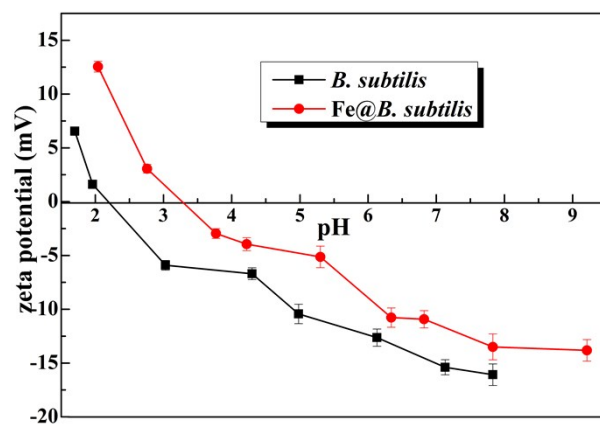

**Table S1.**

| Samples | Bacillus subtilis | Fe@Bacillus subtilis |
|---------|-------------------|----------------------|
| C       | 45.98             | 27.17                |
| N       | 19.34             | 6.57                 |
| O       | 31.83             | 28.98                |
| S       | 2.86              | 0.52                 |
| Cl      | --                | 17.28                |
| Fe      | --                | 19.48                |

**Table S2.**

| Samples | Fe@Bacillus subtilis |
|---------|----------------------|
| C       | 76.4                 |
| N       | 1.88                 |
| O       | 16.7                 |
| Cl      | 2.86                 |
| Fe      | 2.24                 |

**Table S3.**

| Sample            | $S_{\text{BET}}$<br>(m <sup>2</sup> /g) | Pore<br>volume(cm <sup>3</sup> /g) | Average pore<br>size (nm) |
|-------------------|-----------------------------------------|------------------------------------|---------------------------|
| Bacillus subtilis | 4.94                                    | 0.005                              | 5.9                       |
| Fe@B. subtilis    | 6.95                                    | 0.011                              | 6.1                       |
